# Supplementary material for: Irregular Findings on Teatcups in Milking Parlours in Sheep and Goat Farms and Potential Predictors
Source: MDPI journal article supplement (doi:10.3390/ani13193004), 2023-09-23
Supplement: s1 [file s1]

# Irregular Findings on Teatcups of Milking Parlours in Sheep and Goat Farms and Potential Predictors

Charalambia K. Michael, Daphne T. Lianou, Vasia S. Mavrogianni, Efthymia Petinaki and George C. Fthenakis

**Table S1.** Details of multivariable models employed for the evaluation of predictors for the presence of irregular findings on teatcups of milking parlours in 255 sheep flocks and 66 goat herds in Greece.

| Outcome                                      | Variables offered to the multivariable models ( <i>n</i> ) | Variables required in the final models                                                                                                                                                                                                                                                                                                     |
|----------------------------------------------|------------------------------------------------------------|--------------------------------------------------------------------------------------------------------------------------------------------------------------------------------------------------------------------------------------------------------------------------------------------------------------------------------------------|
| Presence of teatcups with irregular findings | 8                                                          | (a) Month into the lactation period at sampling, (b) No. of ewes / does in the flocks / herds, (c) Daily number of milking sessions, (d) Number of available milking units per animal position, (e) System pulsation rate, (f) Water cleaning of parlour after the milking sessions, (g) Length of animal farming experience of the farmer |
| Presence of teatcups with dirt               | 7                                                          | (a) Month into the lactation period at sampling, (b) No. of ewes / does in the flocks / herds, (c) Number of available milking units per animal position, (d) Water cleaning of parlour after the milking sessions, (e) Length of animal farming experience of the farmer                                                                  |
| Presence of teatcups with milk residues      | 2                                                          | (a) Season of the year when sampling was performed (b) Daily number of milking sessions                                                                                                                                                                                                                                                    |
| Presence of teatcups with cracks or tears    | 2                                                          | (a) Month into the lactation period at sampling, (b) System vacuum level                                                                                                                                                                                                                                                                   |

**Table S2.** Results (frequencies) of univariable analysis of variables evaluated for association with the outcome ‘presence of teatcups with irregular findings’ in the milking parlours of 255 sheep flocks and 66 goat herds in Greece.

| Farms in which no teatcups with irregular findings were found ( <i>n</i> = 171)    |                |                |           | Farms in which teatcups with irregular findings were found ( <i>n</i> = 150) |                |                |           |          |
|------------------------------------------------------------------------------------|----------------|----------------|-----------|------------------------------------------------------------------------------|----------------|----------------|-----------|----------|
| Season of the year when sampling was performed                                     |                |                |           |                                                                              |                |                |           |          |
| Spring                                                                             | Summer         | Autumn         | Winter    | Spring                                                                       | Summer         | Autumn         | Winter    | <i>p</i> |
| 60                                                                                 | 43             | 21             | 47        | 28                                                                           | 66             | 16             | 40        | 0.0009   |
| Month into the lactation period at sampling                                        |                |                |           |                                                                              |                |                |           |          |
| 5.0 ± 0.2 months                                                                   |                |                |           | 5.8 ± 0.2 months                                                             |                |                |           | 0.017    |
| Management system applied in farms                                                 |                |                |           |                                                                              |                |                |           |          |
| Intensive                                                                          | Semi-intensive | Semi-extensive | Extensive | Intensive                                                                    | Semi-intensive | Semi-extensive | Extensive | <i>p</i> |
| 28                                                                                 | 73             | 68             | 2         | 24                                                                           | 76             | 46             | 4         | 0.27     |
| No. of ewes / does in the flock / herd                                             |                |                |           |                                                                              |                |                |           |          |
| 308 ± 17 animals                                                                   |                |                |           | 347 ± 23 animals                                                             |                |                |           | 0.16     |
| Average age of culling females                                                     |                |                |           |                                                                              |                |                |           |          |
| 5.9 ± 0.1 years                                                                    |                |                |           | 5.9 ± 0.1 years                                                              |                |                |           | 0.82     |
| Daily number of milking sessions                                                   |                |                |           |                                                                              |                |                |           |          |
| One                                                                                | Two            | Three          | One       | Two                                                                          | Three          |                |           | <i>p</i> |
| 2                                                                                  | 144            | 25             | 1         | 113                                                                          | 36             |                |           | 0.10     |
| Application of post-milking teat disinfection                                      |                |                |           |                                                                              |                |                |           |          |
| Yes                                                                                | No             | Yes            | No        |                                                                              |                |                |           | <i>p</i> |
| 37                                                                                 | 134            | 25             | 125       |                                                                              |                |                |           | 0.26     |
| Annual milk production per animal                                                  |                |                |           |                                                                              |                |                |           |          |
| 231 ± 7 L                                                                          |                |                |           | 223 ± 7 L                                                                    |                |                |           | 0.45     |
| Years since initial establishment or most recent renovation of the milking parlour |                |                |           |                                                                              |                |                |           |          |
| 7.5 ± 0.5 years                                                                    |                |                |           | 8.1 ± 0.5 years                                                              |                |                |           | 0.40     |

| Volume of the parlour                                 |          |                 |                  |             |              |                 |                  |          |
|-------------------------------------------------------|----------|-----------------|------------------|-------------|--------------|-----------------|------------------|----------|
| 201 ± 12 m³                                           |          |                 |                  | 199 ± 12 m³ |              |                 |                  | 0.93     |
| Material of the floor of the milking parlour          |          |                 |                  |             |              |                 |                  |          |
| Concrete                                              | Tiles    | Soil            | Other            | Concrete    | Tiles        | Soil            | Other            | <i>p</i> |
| 94                                                    | 27       | 29              | 21               | 82          | 29           | 21              | 18               | 0.79     |
| Type of milking parlour                               |          |                 |                  |             |              |                 |                  |          |
| Fishbone                                              | Circular | Linear parallel | Linear one-sided | Fishbone    | Circular     | Linear parallel | Linear one-sided | <i>p</i> |
| 1                                                     | 6        | 61              | 103              | 0           | 8            | 51              | 91               | 0.67     |
| Type of milking system                                |          |                 |                  |             |              |                 |                  |          |
| Mobile                                                |          | Built-in        |                  | Mobile      |              | Built-in        |                  | <i>p</i> |
| 22                                                    |          | 149             |                  | 20          |              | 130             |                  | 0.90     |
| Number of animal positions in the parlour             |          |                 |                  |             |              |                 |                  |          |
| Less than 24                                          |          | 24              | Over 24          |             | Less than 24 |                 | 24               | <i>p</i> |
| 63                                                    |          | 70              | 38               |             | 48           |                 | 67               | 0.66     |
| Number of available milking units per animal position |          |                 |                  |             |              |                 |                  |          |
| < 1                                                   |          | 1               |                  | < 1         |              | 1               |                  | <i>p</i> |
| 110                                                   |          | 61              |                  | 109         |              | 41              |                  | 0.11     |
| Provision of feed in the parlour                      |          |                 |                  |             |              |                 |                  |          |
| Yes                                                   |          | No              |                  | Yes         |              | No              |                  | <i>p</i> |
| 154                                                   |          | 17              |                  | 134         |              | 16              |                  | 0.83     |
| Availability of automated milk quantity measurement   |          |                 |                  |             |              |                 |                  |          |
| Yes                                                   |          | No              |                  | Yes         |              | No              |                  | <i>p</i> |
| 10                                                    |          | 161             |                  | 8           |              | 142             |                  | 0.84     |

| Availability of milk quality indicators                    |                                |                            |                            |                                |                            |          |
|------------------------------------------------------------|--------------------------------|----------------------------|----------------------------|--------------------------------|----------------------------|----------|
| Yes                                                        |                                | No                         | Yes                        |                                | No                         | <i>p</i> |
| 0                                                          |                                | 171                        | 0                          |                                | 150                        | n/a      |
| Availability of milk flow indicators                       |                                |                            |                            |                                |                            |          |
| Yes                                                        |                                | No                         | Yes                        |                                | No                         | <i>p</i> |
| 1                                                          |                                | 170                        | 3                          |                                | 147                        | 0.25     |
| System pulsation rate                                      |                                |                            |                            |                                |                            |          |
| < 140 p. min <sup>-1</sup>                                 | 140 - 150 p. min <sup>-1</sup> | > 150 p. min <sup>-1</sup> | < 140 p. min <sup>-1</sup> | 140 - 150 p. min <sup>-1</sup> | > 150 p. min <sup>-1</sup> | <i>p</i> |
| 36                                                         | 98                             | 37                         | 42                         | 86                             | 22                         | 0.16     |
| System vacuum level                                        |                                |                            |                            |                                |                            |          |
| < 38 kPa                                                   | 38 - 42 kPa                    | > 42 kPa                   | < 38 kPa                   | 38 - 42 kPa                    | > 42 kPa                   | <i>p</i> |
| 16                                                         | 133                            | 22                         | 11                         | 125                            | 14                         | 0.45     |
| System pulsation rate to vacuum level ratio                |                                |                            |                            |                                |                            |          |
|                                                            | (3.7 ± 0.1) : 1                |                            |                            | (3.7 ± 0.1) : 1                |                            | 0.73     |
| Type of flow line                                          |                                |                            |                            |                                |                            |          |
| High                                                       | Low                            | Other                      | High                       | Low                            | Other                      | <i>p</i> |
| 127                                                        | 32                             | 12                         | 98                         | 39                             | 13                         | 0.21     |
| Frequency of check-ups of the system by farmer             |                                |                            |                            |                                |                            |          |
| Daily                                                      | Less frequently than daily     |                            | Daily                      | Less frequently than daily     |                            | <i>p</i> |
| 142                                                        | 29                             |                            | 132                        | 18                             |                            | 0.21     |
| Annual frequency of check-ups of the system by technicians |                                |                            |                            |                                |                            |          |
| < 1 check-up                                               | 1 - 2 check-ups                | > 2 check-ups              | < 1 check-up               | 1 - 2 check-ups                | > 2 check-ups              | <i>p</i> |
| 31                                                         | 116                            | 24                         | 21                         | 100                            | 29                         | 0.33     |
| Water cleaning of parlour after the milking sessions       |                                |                            |                            |                                |                            |          |
| Yes                                                        |                                | No                         | Yes                        |                                | No                         | <i>p</i> |
| 164                                                        |                                | 7                          | 148                        |                                | 2                          | 0.14     |

| Temperature of cleaning water                                    |                              |                               |                |                               |          |          |
|------------------------------------------------------------------|------------------------------|-------------------------------|----------------|-------------------------------|----------|----------|
| < 50 °C                                                          |                              | ≥ 50 °C                       | < 50 °C        | ≥ 50 °C                       | <i>p</i> |          |
| 8                                                                |                              | 163                           | 10             | 140                           | 0.44     |          |
| Use of detergent for parlour cleaning after the milking sessions |                              |                               |                |                               |          |          |
| Yes                                                              |                              | No                            | Ye             | No                            | <i>p</i> |          |
| 169                                                              |                              | 2                             | 149            | 1                             | 0.64     |          |
| Frequency of changing teatcups                                   |                              |                               |                |                               |          |          |
| Up to annually                                                   |                              | Less frequently than annually | Up to annually | Less frequently than annually | <i>p</i> |          |
| 79                                                               |                              | 92                            | 80             | 70                            | > 0.20   |          |
| Age of the farmer                                                |                              |                               |                |                               |          |          |
|                                                                  | 45.0 ± 0.9 years             |                               |                | 46.2 ± 0.9 years              | 0.34     |          |
| Length of previous animal farming experience                     |                              |                               |                |                               |          |          |
|                                                                  | 20.2 ± 1.2 years             |                               |                | 24.0 ± 1.3 years              | 0.034    |          |
| Education of farmer                                              |                              |                               |                |                               |          |          |
| Primary                                                          | Secondary and post-secondary | Tertiary                      | Primary        | Secondary and post-secondary  | Tertiary | <i>p</i> |
| 27                                                               | 118                          | 26                            | 19             | 114                           | 17       | 0.34     |
| Presence of working staff in the farm                            |                              |                               |                |                               |          |          |
| Yes                                                              |                              | No                            | Yes            | No                            | <i>p</i> |          |
| 76                                                               |                              | 95                            | 66             | 84                            | 0.93     |          |

**Table S3.** Results (frequencies) of univariable analysis of variables evaluated for association with the outcome ‘presence of teatcups with dirt’ in the milking parlours of 255 sheep flocks and 66 goat herds in Greece.

| Farms in which no teatcups with dirt were found ( <i>n</i> = 186) |                                |                            |        | Farms in which teatcups with dirt were found ( <i>n</i> = 135) |                                |                            |        |          |
|-------------------------------------------------------------------|--------------------------------|----------------------------|--------|----------------------------------------------------------------|--------------------------------|----------------------------|--------|----------|
| Season of the year when sampling was performed                    |                                |                            |        |                                                                |                                |                            |        |          |
| Spring                                                            | Summer                         | Autumn                     | Winter | Spring                                                         | Summer                         | Autumn                     | Winter | <i>p</i> |
| 63                                                                | 48                             | 26                         | 49     | 25                                                             | 61                             | 11                         | 38     | <0.0001  |
| Month into the lactation period at sampling                       |                                |                            |        |                                                                |                                |                            |        |          |
| 5.5 ± 0.2 months                                                  |                                |                            |        | 6.0 ± 0.2 months                                               |                                |                            |        | 0.002    |
| No. of ewes/does in the flock / herd                              |                                |                            |        |                                                                |                                |                            |        |          |
| 309 ± 13 animals                                                  |                                |                            |        | 350 ± 25 animals                                               |                                |                            |        | 0.15     |
| Daily number of milking sessions                                  |                                |                            |        |                                                                |                                |                            |        |          |
| One                                                               | Two                            | Three                      |        | One                                                            | Two                            | Three                      |        | <i>p</i> |
| 2                                                                 | 154                            | 30                         |        | 1                                                              | 103                            | 31                         |        | 0.30     |
| Number of available milking units per animal position             |                                |                            |        |                                                                |                                |                            |        |          |
| < 1                                                               |                                | 1                          |        | < 1                                                            |                                | 1                          |        | <i>p</i> |
| 121                                                               |                                | 65                         |        | 98                                                             |                                | 37                         |        | 0.15     |
| System pulsation rate                                             |                                |                            |        |                                                                |                                |                            |        |          |
| < 140 p. min <sup>-1</sup>                                        | 140 - 150 p. min <sup>-1</sup> | > 150 p. min <sup>-1</sup> |        | < 140 p. min <sup>-1</sup>                                     | 140 - 150 p. min <sup>-1</sup> | > 150 p. min <sup>-1</sup> |        | <i>p</i> |
| 40                                                                | 108                            | 38                         |        | 38                                                             | 76                             | 21                         |        | 0.29     |
| System vacuum level                                               |                                |                            |        |                                                                |                                |                            |        |          |
| < 38 kPa                                                          | 38 - 42 kPa                    | > 42 kPa                   |        | < 38 kPa                                                       | 38 - 42 kPa                    | > 42 kPa                   |        | <i>p</i> |
| 17                                                                | 143                            | 26                         |        | 10                                                             | 115                            | 10                         |        | 0.14     |
| Water cleaning of parlour after the milking sessions              |                                |                            |        |                                                                |                                |                            |        |          |
| Yes                                                               |                                | No                         |        | Yes                                                            |                                | No                         |        | <i>p</i> |
| 178                                                               |                                | 8                          |        | 134                                                            |                                | 1                          |        | 0.06     |

| Length of previous animal farming experience |  |                  |      |
|----------------------------------------------|--|------------------|------|
| 20.7 ± 1.0 years                             |  | 23.5 ± 1.4 years | 0.11 |

**Table S4.** Results (frequencies) of univariable analysis of variables evaluated for association with the outcome ‘presence of teatcups with milk residues’ in the milking parlours of 255 sheep flocks and 66 goat herds in Greece.

| Farms in which no teatcups with milk residues were found ( <i>n</i> = 267) |                                |                            |        | Farms in which teatcups with milk residues were found ( <i>n</i> = 54) |                                |                            |        |          |
|----------------------------------------------------------------------------|--------------------------------|----------------------------|--------|------------------------------------------------------------------------|--------------------------------|----------------------------|--------|----------|
| Season of the year when sampling was performed                             |                                |                            |        |                                                                        |                                |                            |        |          |
| Spring                                                                     | Summer                         | Autumn                     | Winter | Spring                                                                 | Summer                         | Autumn                     | Winter | <i>p</i> |
| 79                                                                         | 84                             | 32                         | 72     | 9                                                                      | 25                             | 5                          | 15     | 0.11     |
| Month into the lactation period at sampling                                |                                |                            |        |                                                                        |                                |                            |        |          |
| 5.4 ± 0.2 months                                                           |                                |                            |        | 5.4 ± 0.4 months                                                       |                                |                            |        | 0.94     |
| No. of ewes / does in the flock / herd                                     |                                |                            |        |                                                                        |                                |                            |        |          |
| 327 ± 16 animals                                                           |                                |                            |        | 322 ± 27 animals                                                       |                                |                            |        | 0.90     |
| Daily number of milking sessions                                           |                                |                            |        |                                                                        |                                |                            |        |          |
| One                                                                        | Two                            | Three                      |        | One                                                                    | Two                            | Three                      |        | <i>p</i> |
| 3                                                                          | 218                            | 46                         |        | 0                                                                      | 39                             | 15                         |        | 0.15     |
| Number of available milking units per animal position                      |                                |                            |        |                                                                        |                                |                            |        |          |
| < 1                                                                        |                                | 1                          | < 1    |                                                                        | 1                              |                            |        | <i>p</i> |
| 183                                                                        |                                | 84                         | 36     |                                                                        | 18                             |                            |        | 0.79     |
| System pulsation rate                                                      |                                |                            |        |                                                                        |                                |                            |        |          |
| < 140 p. min <sup>-1</sup>                                                 | 140 - 150 p. min <sup>-1</sup> | > 150 p. min <sup>-1</sup> |        | < 140 p. min <sup>-1</sup>                                             | 140 - 150 p. min <sup>-1</sup> | > 150 p. min <sup>-1</sup> |        | <i>p</i> |
| 62                                                                         | 156                            | 49                         |        | 16                                                                     | 28                             | 10                         |        | 0.58     |
| System vacuum level                                                        |                                |                            |        |                                                                        |                                |                            |        |          |
| < 38 kPa                                                                   | 38 - 42 kPa                    | > 42 kPa                   |        | < 38 kPa                                                               | 38 - 42 kPa                    | > 42 kPa                   |        | <i>p</i> |
| 23                                                                         | 213                            | 31                         |        | 4                                                                      | 45                             | 5                          |        | 0.83     |
| Water cleaning of parlour after the milking sessions                       |                                |                            |        |                                                                        |                                |                            |        |          |
| Yes                                                                        |                                | No                         | Yes    |                                                                        | No                             |                            |        | <i>p</i> |
| 259                                                                        |                                | 8                          | 53     |                                                                        | 1                              |                            |        | 0.64     |



| Length of previous animal farming experience |  |                  |      |
|----------------------------------------------|--|------------------|------|
| 21.6 ± 0.9 years                             |  | 23.7 ± 2.3 years | 0.37 |

**Table S5.** Results (frequencies) of univariable analysis of variables evaluated for association with the outcome ‘presence of teatcups with cracks or tears’ in the milking parlours of 255 sheep flocks and 66 goat herds in Greece.

| Farms in which no teatcups with cracks or tears were found ( <i>n</i> = 302) |                                |                            |        | Farms in which teatcups with cracks or tears were found ( <i>n</i> = 19) |                                |                            |        |          |
|------------------------------------------------------------------------------|--------------------------------|----------------------------|--------|--------------------------------------------------------------------------|--------------------------------|----------------------------|--------|----------|
| Season of the year when sampling was performed                               |                                |                            |        |                                                                          |                                |                            |        |          |
| Spring                                                                       | Summer                         | Autumn                     | Winter | Spring                                                                   | Summer                         | Autumn                     | Winter | <i>p</i> |
| 86                                                                           | 102                            | 33                         | 81     | 2                                                                        | 7                              | 4                          | 6      | 0.27     |
| Month into the lactation period at sampling                                  |                                |                            |        |                                                                          |                                |                            |        |          |
| 5.5 ± 0.2 months                                                             |                                |                            |        | 4.3 ± 0.9 months                                                         |                                |                            |        | 0.07     |
| No. of ewes / does in the flock / herd                                       |                                |                            |        |                                                                          |                                |                            |        |          |
| 326 ± 14 animals                                                             |                                |                            |        | 326 ± 76 animals                                                         |                                |                            |        | 0.99     |
| Daily number of milking sessions                                             |                                |                            |        |                                                                          |                                |                            |        |          |
| One                                                                          | Two                            | Three                      |        | One                                                                      | Two                            | Three                      |        | <i>p</i> |
| 3                                                                            | 243                            | 56                         |        | 0                                                                        | 14                             | 5                          |        | 0.65     |
| Number of available milking units per animal position                        |                                |                            |        |                                                                          |                                |                            |        |          |
| < 1                                                                          |                                | 1                          |        | < 1                                                                      |                                | 1                          |        | <i>p</i> |
| 207                                                                          |                                | 95                         |        | 12                                                                       |                                | 7                          |        | 0.62     |
| System pulsation rate                                                        |                                |                            |        |                                                                          |                                |                            |        |          |
| < 140 p. min <sup>-1</sup>                                                   | 140 - 150 p. min <sup>-1</sup> | > 150 p. min <sup>-1</sup> |        | < 140 p. min <sup>-1</sup>                                               | 140 - 150 p. min <sup>-1</sup> | > 150 p. min <sup>-1</sup> |        | <i>p</i> |
| 74                                                                           | 171                            | 57                         |        | 4                                                                        | 13                             | 2                          |        | 0.55     |
| System vacuum level                                                          |                                |                            |        |                                                                          |                                |                            |        |          |
| < 38 kPa                                                                     | 38 - 42 kPa                    | > 42 kPa                   |        | < 38 kPa                                                                 | 38 - 42 kPa                    | > 42 kPa                   |        | <i>p</i> |
| 25                                                                           | 248                            | 29                         |        | 2                                                                        | 10                             | 7                          |        | 0.001    |
| Water cleaning of parlour after the milking sessions                         |                                |                            |        |                                                                          |                                |                            |        |          |
| Yes                                                                          |                                | No                         |        | Yes                                                                      |                                | No                         |        | <i>p</i> |
| 293                                                                          |                                | 9                          |        | 19                                                                       |                                | 0                          |        | 0.45     |

| Length of previous animal farming experience |  |                  |      |
|----------------------------------------------|--|------------------|------|
| 21.9 ± 0.9 years                             |  | 22.3 ± 5.3 years | 0.93 |
